# Supplementary material for: Oxidative Stress and Antioxidant Defense Mechanisms in Acute Ischemic Stroke Patients with Concurrent COVID-19 Infection
Source: MDPI journal article supplement (doi:10.3390/ijms242316790), 2023-11-27
Supplement: s1 [file s1]

Supplementary Table S1 – Modified Rankin Scale Score.

| <b>Modified Rankin Scale</b> |                                                                                                                       |
|------------------------------|-----------------------------------------------------------------------------------------------------------------------|
| 0                            | No symptoms                                                                                                           |
| 1                            | No significant disability. Able to carry out all usual activities, despite some symptoms                              |
| 2                            | Slight disability. Able to look after own affairs without assistance, but unable to carry out all previous activities |
| 3                            | Moderate disability. Requires some help, but able to walk unassisted                                                  |
| 4                            | Moderately severe disability. Unable to attend to own bodily needs without assistance, and unable to walk unassisted  |
| 5                            | Severe disability. Requires constant nursing care and attention, bedridden, incontinent                               |
| 6                            | Dead                                                                                                                  |

Supplementary Table S2 – Medical Research Council (MRC) muscle strength scale Score.

| <b>Medical Research Council (MRC) muscle strength scale</b> |                                                                                     |
|-------------------------------------------------------------|-------------------------------------------------------------------------------------|
| 0                                                           | No muscle contraction or movement observed                                          |
| 1                                                           | Muscle contraction is present, but there is no joint movement                       |
| 2                                                           | The muscle can move the joint when gravity is eliminated (passive movement)         |
| 3                                                           | The muscle can move the joint against gravity, but not against any added resistance |
| 4                                                           | The muscle can move the joint against some resistance but is weaker than normal     |
| 5                                                           | Normal muscle strength, with the joint able to move against full resistance         |

Supplementary Table S3 – The National Institutes of Health Stroke Scale (NIHSS).

| The National Institutes of Health Stroke Scale (NIHSS) |   |                           |
|--------------------------------------------------------|---|---------------------------|
| Level of consciousness                                 | 0 | Alert                     |
|                                                        | 1 | Not alert, arousable      |
|                                                        | 2 | Not alert, obtunded       |
|                                                        | 3 | Unresponsive              |
| LOC questions                                          | 0 | Answers both correctly    |
|                                                        | 1 | Answers one correctly     |
|                                                        | 2 | Incorrect                 |
| LOC commands                                           | 0 | Obeys both correctly      |
|                                                        | 1 | Obeys one correctly       |
|                                                        | 2 | Incorrect                 |
| Gaze                                                   | 0 | Normal                    |
|                                                        | 1 | Partial gaze palsy        |
|                                                        | 2 | Forced deviation          |
| Visual fields                                          | 0 | No visual loss            |
|                                                        | 1 | Partial hemianopsia       |
|                                                        | 2 | Complete hemianopsia      |
|                                                        | 3 | Bilateral hemianopsia     |
| Facial palsy                                           | 0 | Normal                    |
|                                                        | 1 | Minor paralysis           |
|                                                        | 2 | Partial paralysis         |
|                                                        | 3 | Complete paralysis        |
| Motor arm<br>(A)Left; (B) Right                        | 0 | No drift                  |
|                                                        | 1 | Drift before 10s          |
|                                                        | 2 | Falls before 10s          |
|                                                        | 3 | No effort against gravity |
|                                                        | 4 | No movement               |
| Motor leg<br>(A)Left; (B) Right                        | 0 | No drift                  |
|                                                        | 1 | Drift before 10s          |
|                                                        | 2 | Falls before 10s          |

|                        |   |                           |
|------------------------|---|---------------------------|
|                        | 3 | No effort against gravity |
|                        | 4 | No movement               |
| Ataxia                 | 0 | Absent                    |
|                        | 1 | One limb                  |
|                        | 2 | Two limbs                 |
| Sensory                | 0 | Normal                    |
|                        | 1 | Mild loss                 |
|                        | 2 | Severe loss               |
| Language               | 0 | Normal                    |
|                        | 1 | Mild aphasia              |
|                        | 2 | Severe aphasia            |
|                        | 3 | Mute or global aphasia    |
| Dysarthria             | 0 | Normal                    |
|                        | 1 | Mild                      |
|                        | 2 | Severe                    |
| Extinction/inattention | 0 | Normal                    |
|                        | 1 | Mild                      |
|                        | 2 | Severe                    |
